# Supplementary material for: Polypeptide-engineered physical hydrogels designed from the coiled-coil region of cartilage oligomeric matrix protein for three-dimensional cell culture
Source: Royal Society of Chemistry journal article supplement (doi:10.1039/c4tb00107a), 2014-01-01
Supplement: c4tb00107a1.pdf [file c4tb00107a1.pdf]

## **Supporting Information**

### **Polypeptide-engineered physical hydrogels designed from the coiled-coil region of cartilage oligomeric matrix protein for three-dimensional cell culture**

**Ming-Hao Yao, Jie Yang, Ming-Shuo Du, Ji-Tao Song, Yong Yu, Wei Chen, Yuan-Di Zhao\*,  
Bo Liu\***

Britton Chance Center for Biomedical Photonics at Wuhan National Laboratory for Optoelectronics

– Hubei Bioinformatics & Molecular Imaging Key Laboratory, Department of Biomedical

Engineering, College of Life Science and Technology, Huazhong University of Science and

Technology, Wuhan 430074, P. R. China

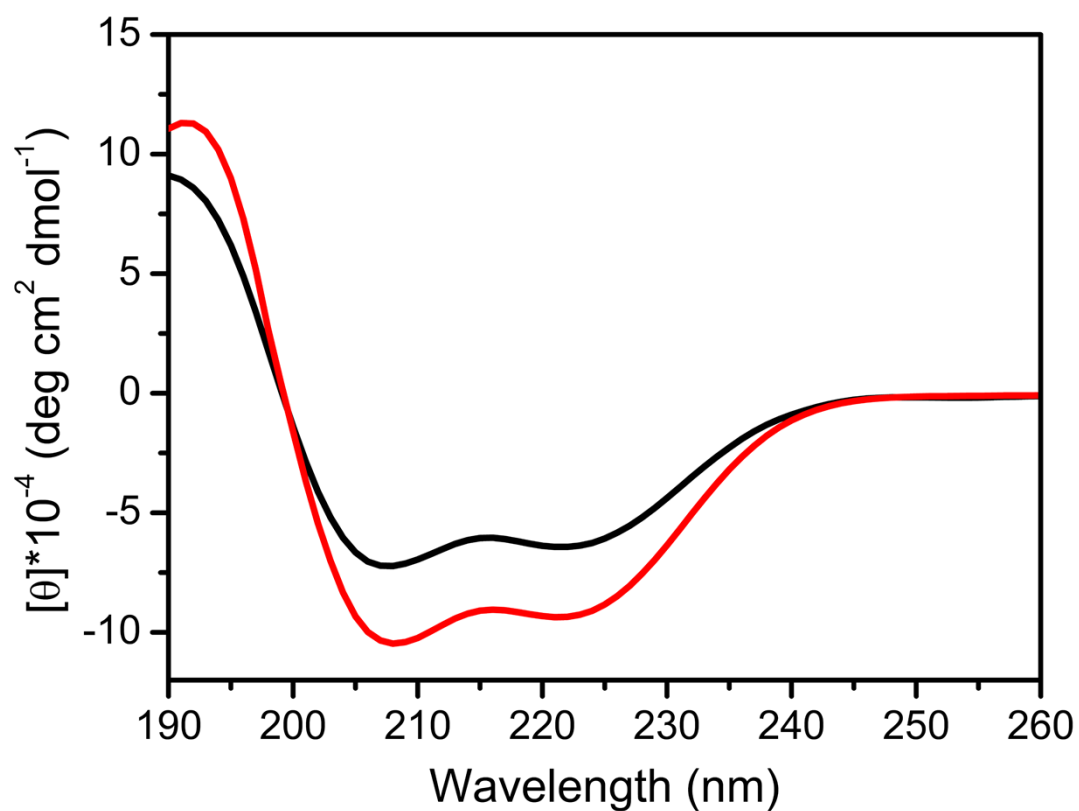

Figure S1. Circular dichroism (CD) spectroscopy of RGDPCys (black line) and RGD-PEG-acrylate<sub>6k</sub> (red line) was conducted on a Jasco J-810 CD spectrometer. Both samples were at a concentration of 5  $\mu$ M in 10 mM sodium phosphate buffer, pH 7.4. The wavelength spectrum was measured over a range from 190 to 260 nm with a step size of 1 nm at 25  $^{\circ}$ C. All scans were made in triplicate and averaged.
